# Supplementary material for: A ferrocene-based multiple-stimuli responsive organometallogel
Source: Royal Society of Chemistry journal article supplement (doi:10.1039/c3sm53141d), 2014-01-01

## Supporting Information

### Ferrocene-Based Multiple-Stimuli Responsive Organometallogel

Ting He, Kun Li,\*Na Wang, Ye-Xin Liao, Xin Wang and Xiao-Qi Yu\*

*College of Chemistry, Key Laboratory of Green Chemistry and Technology (Ministry of Education), Sichuan University, Chengdu 610064, People's Republic of China*  
*Fax: + 86 28 85415886; Tel: +86 28 85415886; E-mail: xqyu@scu.edu.cn*

#### 1. Experimental section

##### 1.1 General procedure for the preparation of the gelators

##### 1.2 Scanning electron micrographs (SEM)

##### 1.3 Transmission electron microscopy (TEM)

##### 1.4 The concentration-dependent $^1\text{H}$ NMR

##### 1.5 Cyclic voltammetric measurements

##### 1.6 Redox responsiveness of gel 2

##### 1.7 UV-vis spectra of gelator2

##### 1.8 $\beta$ -CD responsiveness of gel 2

#### 2. Spectral data of the gelators

#### 3. $^1\text{H}$ NMR and $^{13}\text{C}$ NMR Spectras of the gelators

## 1. Experimental section

### 1.1 General routes for the preparation of the gelators

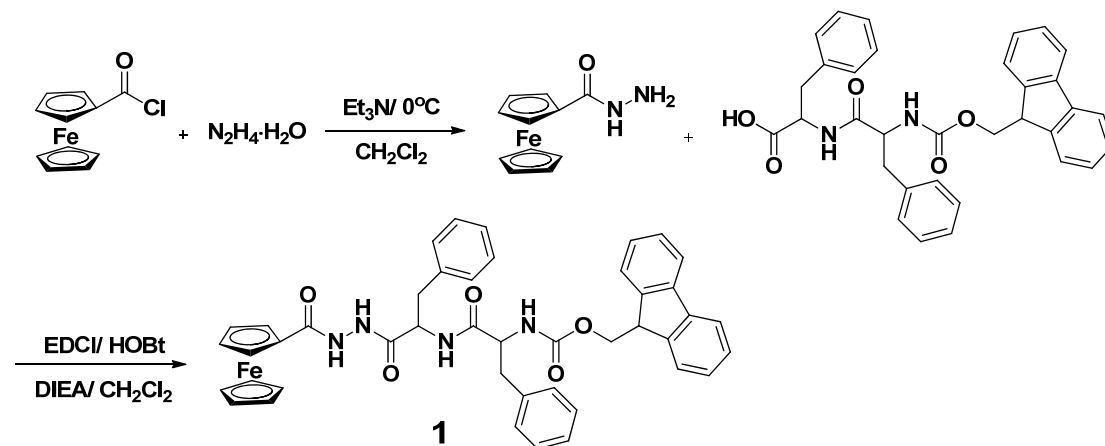

### 1.2 Scanning electronmicrographs (SEM)

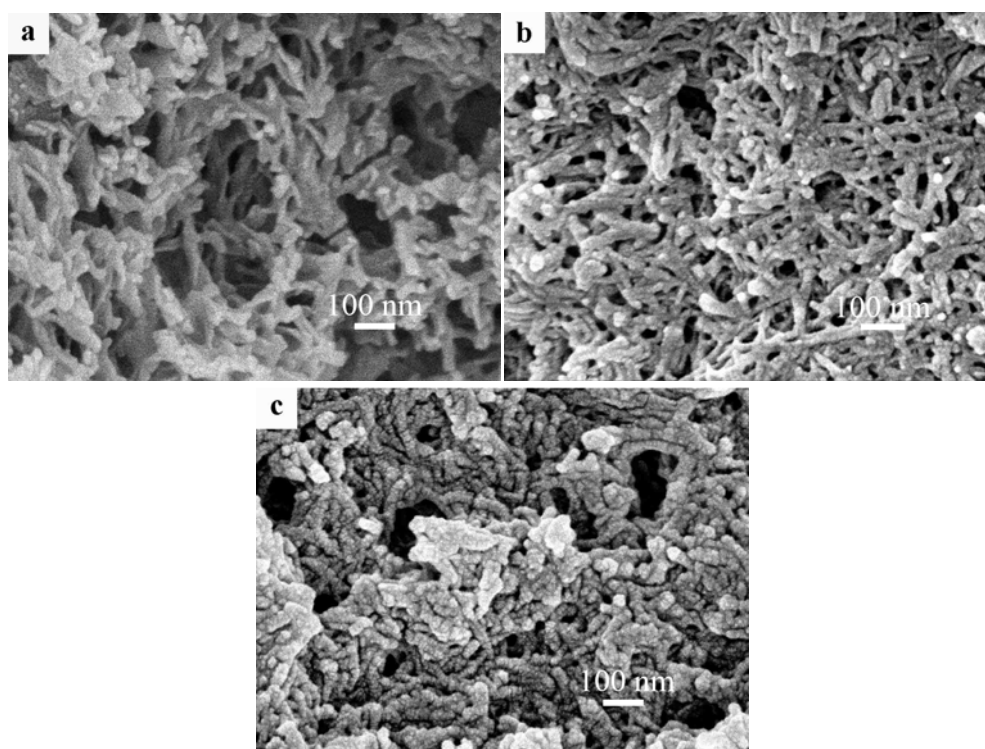

Figure S1. SEM images of gel **1** (26.3 mM) from isopropanol-water mixed solvent with (a) 10% water; (b) 30% water; (c) 50% water.

### 1.3 Transmission electron microscopy (TEM)

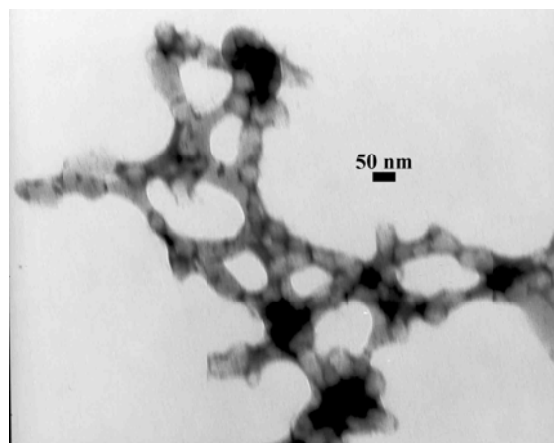

Figure S2. Transmission electron microscopy image of gel **1** from isopropanol-water (v/v=1:1, 2.63mM).

#### 1.4 The concentration-dependent $^1\text{H}$ NMR

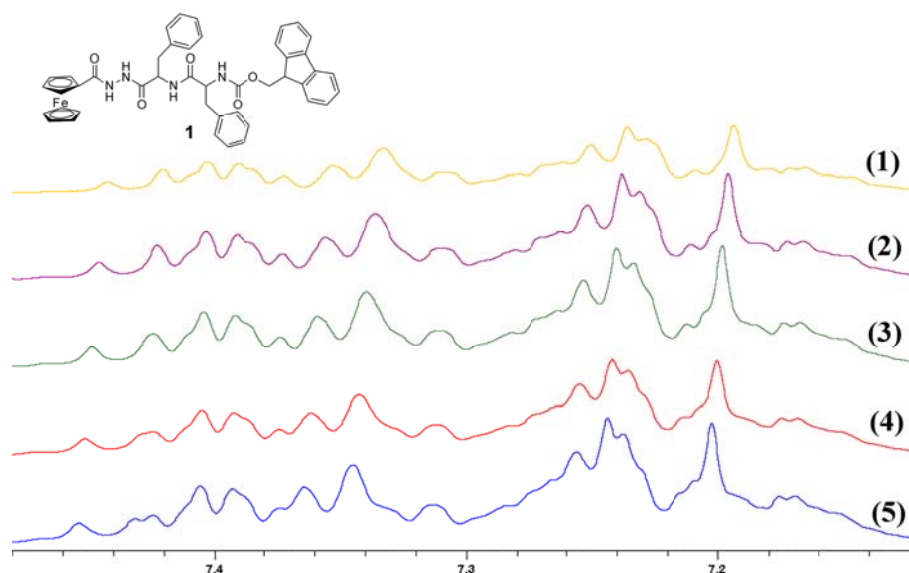

Figure S3. The concentration-dependent  $^1\text{H}$  NMR (DMSO- $d_6$ , room temperature), capturing the aromatic proton section: (1) 10 mg/mL, (2) 15 mg/mL, (3) 20 mg/mL, (4) 25 mg/mL, (5) 30 mg/mL.

#### 1.5 Cyclic voltammetric measurements

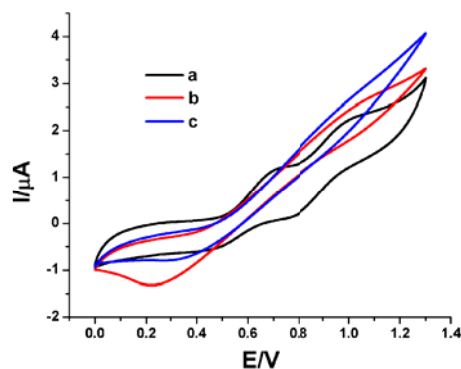

Figure S4. The cyclic voltammograms of the solutions of gelator **2** ((a): 1 mM; (b): 3 mM;

(c): 5 mM).

### 1.6 Redox responsiveness of gel 2

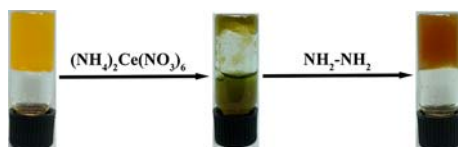

Figure S5. Pictures of the reversible gel-sol phase transition of gel 2 triggered by chemical redox.

### 1.7 UV-vis spectra of gelator 2

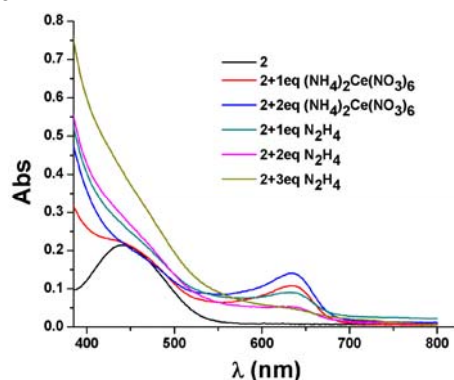

Figure S6. UV-vis spectra of the gelator 2 solution with oxidizing agent and reducing agent (1 mM in isopropanol/water = 3:2).

### 1.8 $\beta$ -CD responsiveness of gel 2

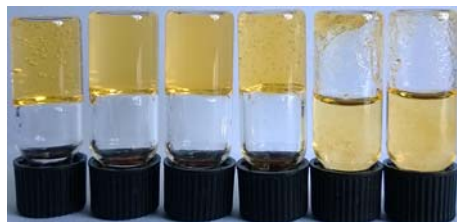

Figure S7. Gel-sol phase transition of gel 2 (3.01 mM in isopropanol/water = 1:1) triggered by different equivalent of  $\beta$ -CD (from left to right, in order, were 0 eq, 1 eq, 2 eq, 3 eq, 4 eq, 5eq).

## 2. Spectral data of the gelators

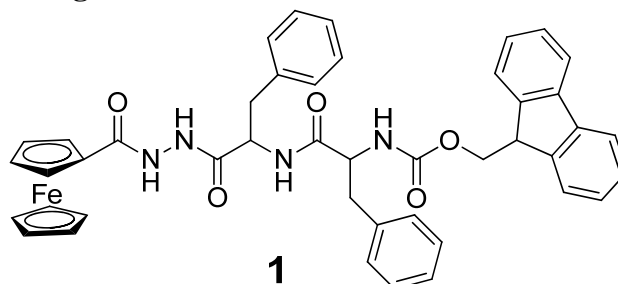

$^1\text{H}$  NMR (400 MHz,  $\text{CDCl}_3$ )  $\delta$  = 9.40 (s, 1H), 8.50 (s, 1H), 7.68-7.72 (t, 2H,  $J$  =

9.5Hz), 7.30-7.46 (m, 5H), 7.05-7.21 (m, 11H), 6.05 (s, 1H), 5.71 (s, 1H), 5.04 (s, 1H), 4.82 (s, 1H), 4.72 (s, 1H), 4.03-4.44 (m, 11H), 2.82-3.20 (m, 4H);  $^{13}\text{C}$  NMR (DMSO- $d_6$ , 100 MHz)  $\delta$  = 38.1, 39.4, 39.6, 39.8, 40.0, 40.2, 40.4, 40.6, 66.1, 68.6, 70.2, 70.8, 70.8, 74.3, 120.5, 127.5, 128.1, 128.4, 128.5, 128.5, 129.7, 129.7, 129.8, 129.9, 138.0, 138.1, 138.5, 138.7, 141.1, 141.2, 141.3, 169.1, 171.3, 171.4, 171.7, 171.8; HRMS(ESI)  $m/z$  calculated for  $\text{C}_{44}\text{H}_{40}\text{FeN}_4\text{O}_5[\text{M}+\text{Na}]^+$  783.2240, found 783.2253.

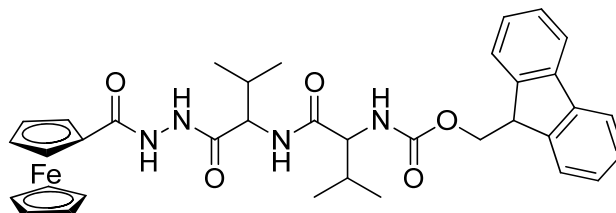

**2**

$^1\text{H}$  NMR (400 MHz,  $\text{CDCl}_3$ )  $\delta$  = 9.00 (s, 1H), 8.60 (s, 1H), 7.69-7.71 (d, 2H,  $J$  = 7.0Hz), 7.49-7.56 (m, 5H), 7.16-7.32 (m, 4H), 6.31 (s, 1H), 6.22-6.24 (d, 1H,  $J$  = 6.3Hz), 4.87 (s, 1H), 4.72-4.75 (d, 2H,  $J$  = 9.3Hz), 4.12-4.36 (m, 9H), 1.85-2.22 (m, 4H), 0.85-1.03 (m, 12H);  $^{13}\text{C}$  NMR (DMSO- $d_6$ , 100 MHz)  $\delta$  = 18.5, 18.7, 18.7, 18.8, 19.8, 19.8, 39.5, 39.7, 39.9, 40.1, 40.3, 40.5, 40.7, 47.1, 47.2, 68.6, 68.9, 70.1, 70.7, 70.8, 74.3, 120.5, 125.7, 125.8, 127.5, 128.1, 141.2, 144.3, 144.4, 169.0, 170.8, 170.9, 171.4, 171.7; HRMS(ESI)  $m/z$  calculated for  $\text{C}_{36}\text{H}_{40}\text{FeN}_4\text{O}_5[\text{M}+\text{H}]^+$  665.2421, found 665.2431.

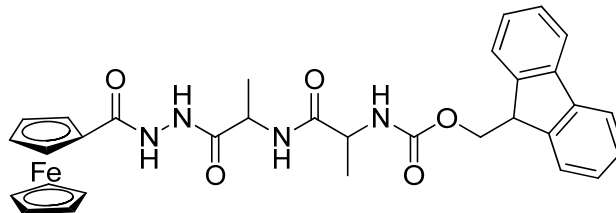

**3**

$^1\text{H}$  NMR (400 MHz,  $\text{CDCl}_3$ )  $\delta$  = 9.21-9.29 (d, 1H,  $J$  = 34.2Hz), 8.22-8.26 (d, 1H,  $J$  = 19.0Hz), 7.72-7.75 (t, 2H,  $J$  = 6.6Hz), 7.53-7.60 (m, 2H), 7.34-7.40 (m, 2H), 7.23-7.30 (m, 2H), 5.89-5.90 (d, 1H,  $J$  = 6.4Hz), 5.63-5.64 (d, 1H,  $J$  = 4.7Hz), 4.67-4.76 (m, 3H), 4.17-4.45 (m, 11H), 1.38-1.46 (m, 6H);  $^{13}\text{C}$  NMR ( $\text{CDCl}_3$ , 100 MHz)  $\delta$  = 14.2, 21.1, 47.0, 60.4, 68.5, 68.6, 70.1, 71.1, 72.3, 76.7, 77.1, 77.4, 120.0, 125.2, 127.1, 127.7, 141.2, 141.3, 143.7, 171.3, 171.4, 173.2, 173.4; HRMS(ESI)  $m/z$  calculated for  $\text{C}_{32}\text{H}_{32}\text{FeN}_4\text{O}_5[\text{M}+\text{Na}]^+$  631.1614, found 631.1617.

### 3. <sup>1</sup>H NMR and <sup>13</sup>C NMR Spectras of the gelators

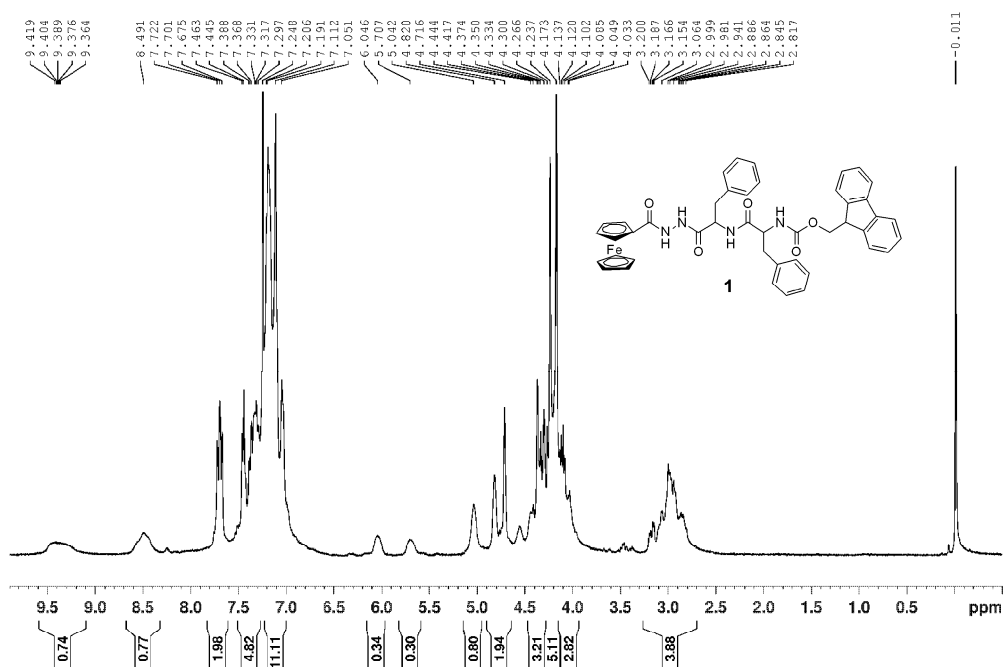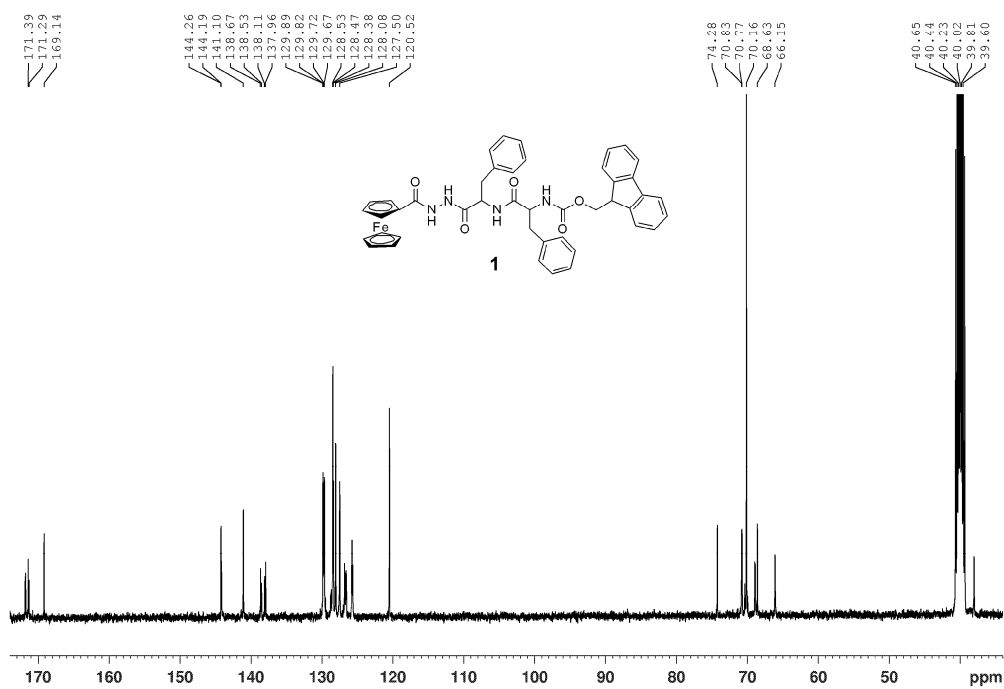

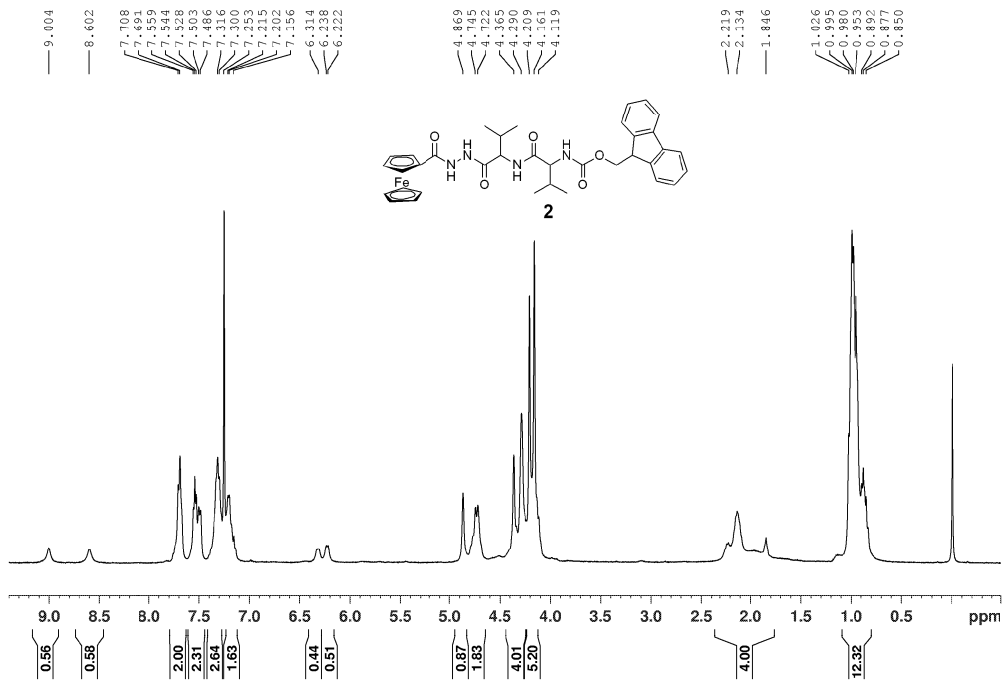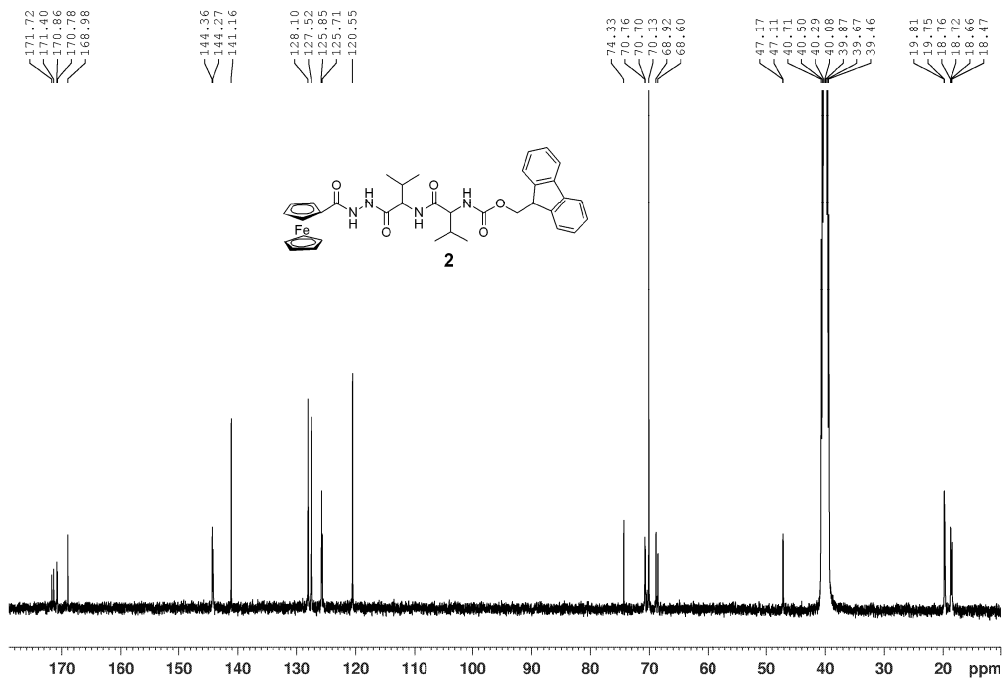

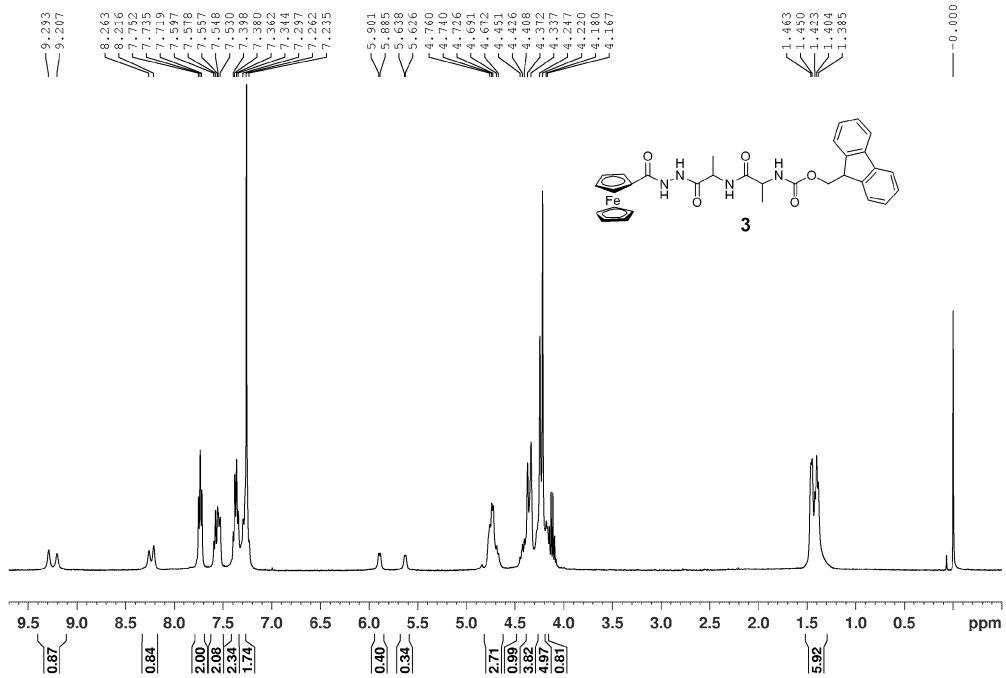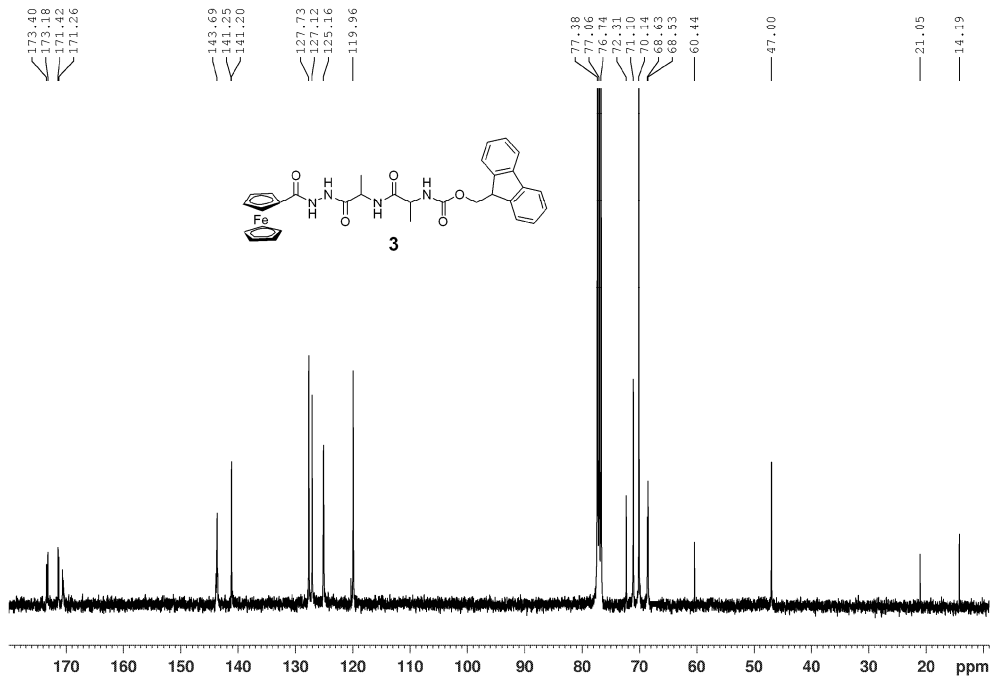

Supplement: c3sm53141d1.pdf [file c3sm53141d1.pdf]
